# Supplementary material for: Physiological response mechanism of Machilus faberi Hemsl under drought stress and rewatering
Source: PeerJ. 2025 Sep 10;13:e19855. doi: 10.7717/peerj.19855 (PMC12433196; doi:10.7717/peerj.19855)
Supplement: Supplemental Information 1 [file peerj-13-19855-s001.xlsx]

## Sheet: Figure.1
Figure. 1 Changes of morphological indexes of M.faberi in different drought stress periods
	Date/concentration	CK			LD			MD			SD
The number of new shoots(pcs)	T0	5	6	7	11	15	17	16	13	17	11	15	11
	T7	6	3	6	8	17	16	13	14	20	9	10	9
	T14	4	2	3	4	10	11	7	10	10	6	8	5
	T21	4	4	4	6	9	10	8	13	13	9	8	5
	T28	7	4	4	6	3	13	10	10	11	9	7	7
	T35	7	4	5	4	12	10	11	14	13	10	6	9
	T42	7	4	5	5	10	10	10	12	10	9	8	7
	T49	7	4	5	7	10	11	9	13	11	9	8	8
	T56	7	4	5	7	11	11	9	14	11	9	8	8
	WT7	8	4	6	7	11	13	9	14	19	11	8	12
	WT14	7	4	5	7	10	12	9	13	17	9	7	11
	WT21	8	4	7	7	14	13	10	14	21	12	9	12
Length of new branch（mm）	T0	4.53	2.43	2.97	3.63	5.29	4.11	4.15	4.2	3.42	3.05	2.77	7.35
	T7	4.93	5.1	4.46	5.64	8.39	10.62	5.77	7.82	5.78	4.55	4.09	10.27
	T14	9.85	7.53	7.37	8.55	9.14	11.27	7.15	6.86	5.66	9.54	8.1	9.31
	T21	15.21	10.83	21.1	13.29	10.16	11.83	12.04	8.95	14.96	11.44	14.04	11.91
	T28	15.44	14.79	20.24	17.3	13.35	14.05	12.18	14.04	15.87	18.63	17.63	16.58
	T35	15.96	14.28	27.39	19.1	14.82	15.16	13.54	15.34	16.79	15.34	16.12	20.57
	T42	22.45	21.14	21.79	25.27	24.91	25.09	31.22	20.16	18.1	16.78	17.11	21.6
	T49	23.05	21.78	22.41	29.27	25.51	25.21	20.31	21.17	19.45	20.1	19.03	22.51
	T56	25.36	27.89	26.62	30.88	26.08	21.54	21.115	21.78	20.45	20.1	19.03	22.51
	WT7	27.57	30.06	28.81	32.16	26.14	24.56	34.33	21.73	31.25	23.03	20.37	23.01
	WT14	29.47	32.43	30.95	34.52	27.84	23.05	35.12	33.765	32.41	27.21	41.62	25.89
	WT21	32.84	33.28	33.06	39.15	26.84	35.73	36.76	23.92	34.7	27.82	27.3	26.78
Plant height（cm）	T0	25.2	24.65	25.75	28.65	30.05	29.45	28	25.35	26.675	30.48	27.45	28.965
	T7	26.285	26.22	26.35	30.63	32.45	30.48	34.63	28.7	31.665	31.35	29.54	30.445
	T14	28.3	26.5	30.1	32	38	33.5	35.5	34.6	35.05	33.5	29.8	31.65
	T21	29.85	28.5	31.2	32.6	36	35.2	38.2	36.2	37.2	33.9	30	31.95
	T28	30.5	29	32	34	36.6	36.8	38	35.6	36.8	33.4	31	32.2
	T35	32.15	33.4	30.9	35.6	36.4	37.3	38.3	36.9	37.6	36.3	30.9	33.6
	T42	34.9	35.4	34.4	35.6	38.2	36.2	39	36.6	37.8	34.4	34.6	34.5
	T49	36.1	35.7	36.5	37.2	39.3	38.2	40	38.7	39.35	35.2	34.9	35.05
	T56	36.985	37.89	36.08	38.88	40.08	39.54	42	39.78	40.89	35.4	35	35.7
	WT7	38.45	39.8	37.1	43.5	42.2	40.4	45.4	42	43.7	38.7	35.4	37.05
	WT14	39.25	39.9	38.6	45	45.5	43.8	48.9	44	46.45	45.2	32.8	39
	WT21	40.5	41	40	47.5	47.5	46	49.7	45	47.35	43.5	36	39.75

## Sheet: Figure.2
Figure. 2 Changes of chlorophyll content of M.faberi under drought stress
	Date/concentration	CK			LD			MD			SD
Chlorophyll a	T0	1.0125	1.01821	1.03811	1.05627	1.02435	1.00344	0.990299	0.979626	0.982719	0.965979	0.925816	0.981978
	T7	1.97621	1.92378	2.04544	2.2393	2.13068	2.19242	2.04083	2.12648	2.06868	1.76872	1.76371	1.76603
	T14	2.65383	2.59563	2.37048	2.65581	2.50655	2.49787	2.46089	2.06142	2.46	2.15134	1.85633	2.08238
	T21	2.32731	2.73921	2.4082	2.60006	2.63676	2.73182	2.27659	2.57078	2.32652	2.53045	2.44385	2.52219
	T28	1.85663	1.83985	1.93647	1.88985	1.91408	1.90023	2.37535	2.22139	2.27698	2.15826	2.07549	2.15549
	T35	1.27632	1.70268	1.46452	1.63046	1.72655	1.65124	1.49296	1.49097	1.36664	2.38191	2.30944	2.17439
	T42	1.5497	1.50058	1.5252	1.23461	1.47788	1.49185	1.56153	1.52626	1.56599	2.01586	1.95536	2.21846
	T49	1.43547	1.12457	1.61816	1.526	1.52689	1.52648	1.27185	1.27555	1.28617	2.01436	2.17894	1.99274
	T56	1.75374	1.75697	1.75796	1.33791	1.33844	1.3351	1.82952	1.82198	1.83267	1.29973	1.2843	1.32011
	WT7	1.79202	1.81962	1.80432	1.1695	1.17255	1.17276	1.54579	1.54248	1.54869	0.889926	0.898776	0.892218
	WT14	1.77543	1.77266	1.77239	1.40288	1.39255	1.37617	1.76587	1.75874	1.77128	1.04279	1.04369	1.05372
	WT21	1.74622	1.74285	1.74372	1.68712	2.10525	1.85717	2.07509	1.79217	2.07028	1.75015	1.75602	1.75326
Chlorophyll b	T0	0.363056	0.436751	0.383907	0.416129	0.459644	0.407272	0.412249	0.380562	0.362861	0.37697	0.373307	0.40123
	T7	0.808528	0.801875	0.815055	0.95332	0.977037	0.945938	0.686794	0.684956	0.676873	0.646643	0.698909	0.667246
	T14	1.30821	1.13814	1.08537	1.11784	1.11756	1.22569	1.02673	0.972753	1.04717	0.76719	0.816614	0.708311
	T21	1.08478	1.17804	1.0414	1.22752	1.14275	1.09652	0.987225	1.05745	1.01567	0.977062	1.2367	1.07912
	T28	0.674886	0.713436	0.818392	0.860553	0.947631	0.836471	0.779963	0.984302	1.02955	1.14229	1.02757	0.998131
	T35	0.708807	0.619747	0.661719	0.602067	0.680004	0.983354	0.699585	0.699154	0.650515	0.865983	0.912406	0.793929
	T42	0.616687	0.506189	0.554234	0.634945	0.518284	0.740755	0.624416	0.593612	0.593363	0.744102	0.81758	0.790702
	T49	0.653415	0.612553	0.635033	0.633443	0.642394	0.606605	0.493652	0.493131	0.49565	0.627973	0.604798	0.562423
	T56	0.667374	0.666067	0.667853	0.5973	0.597247	0.598524	0.693252	0.699413	0.701569	0.569074	0.572298	0.581822
	WT7	0.9172	0.911881	0.89687	0.472821	0.471666	0.478145	0.664455	0.661203	0.652068	0.417645	0.430866	0.417231
	WT14	0.753106	0.752677	0.757937	0.555399	0.551754	0.545283	0.700768	0.699912	0.708831	0.47847	0.496263	0.492698
	WT21	0.847657	0.814371	0.842687	1.10495	1.17393	1.20182	1.05455	0.862695	1.09999	0.786017	0.784848	0.802562
Chlorophyll a + b	T0	2.59894	2.39457	2.62468	2.31825	2.06954	2.40714	2.79465	2.63543	2.78259	2.73208	2.54198	2.57321
	T7	2.52519	2.47369	2.46599	2.24137	2.63987	2.44316	2.53856	2.57201	2.56994	2.59356	2.61525	2.54841
	T14	2.3563	2.26027	2.05897	2.15517	2.37539	2.34681	2.34981	2.38525	2.41974	2.36634	2.6007	2.38552
	T21	2.0512	2.41439	2.34022	2.33826	2.21355	2.28181	2.32649	2.37421	2.31449	2.36015	2.10697	2.4128
	T28	2.67012	2.53612	2.47184	2.35215	2.26856	1.87627	2.60743	2.55021	2.74492	2.27147	1.71185	2.20709
	T35	2.41888	2.40108	2.40136	2.04365	2.17001	2.36847	2.16784	2.14883	2.20073	2.26807	2.46959	2.36801
	T42	2.93495	2.66157	2.71274	2.44919	2.28351	2.29334	2.53596	2.50459	2.54165	2.5931	2.55523	2.40125
	T49	2.25795	2.31672	2.05781	2.44848	2.48579	2.44743	2.59957	2.58775	2.58995	2.03677	2.47776	2.36514
	T56	2.63761	2.65168	2.60747	2.24893	2.23782	2.22857	2.64094	2.63468	2.58612	2.26504	2.28157	2.25439
	WT7	1.97167	1.96205	1.95117	2.4279	2.43498	2.46561	2.33715	2.33693	2.34181	2.07	2.10733	2.15371
	WT14	2.33563	2.3428	2.34506	2.59682	2.47213	2.52554	2.49821	2.49553	2.51726	2.14965	2.13375	2.14188
	WT21	2.11816	2.10615	2.08078	1.78451	1.61071	1.51275	1.95018	2.071	2.01706	2.2115	2.20613	2.18365
Chlorophyll a / b	T0	1.38653	1.39215	1.38505	1.39341	1.37341	1.39546	1.41596	1.41699	1.3998	1.40096	1.39303	1.39295
	T7	2.86262	2.85332	2.76179	3.11782	3.18742	3.12485	2.80628	2.77883	2.70738	2.45264	2.45652	2.44493
	T14	3.55726	4.06699	3.85119	3.57056	4.03129	3.49525	3.26614	3.3651	3.37911	2.73018	2.69037	2.75637
	T21	3.49626	2.92195	3.76519	3.6521	3.64799	3.71942	3.72046	3.51899	3.6677	3.78948	3.53831	3.83333
	T28	2.44347	2.62232	2.51678	3.54126	3.56051	3.57372	3.28793	3.53952	2.93541	3.21095	3.13218	3.18674
	T35	2.54792	2.34468	2.24903	3.03802	3.26053	3.3198	2.54998	2.52438	2.53257	3.15633	3.56898	2.96415
	T42	2.11032	2.11747	2.15602	2.24999	1.71061	2.04005	2.18119	2.1926	2.12871	3.1547	2.52663	2.90994
	T49	1.82793	2.5445	1.73234	2.16135	2.13111	2.13308	2.12951	2.10985	2.10538	2.91182	2.51596	2.42804
	T56	2.42596	2.42535	2.42221	1.93471	1.93295	1.93429	2.52639	2.5196	2.52665	1.89355	1.87267	1.84939
	WT7	2.69924	2.72258	2.67136	1.65813	1.64995	1.64177	2.20978	2.21241	2.19122	1.91693	1.92727	1.93121
	WT14	2.53607	2.52621	2.52492	1.96543	1.94664	1.96119	2.46301	2.47427	2.47398	2.13543	2.12849	2.13991
	WT21	2.56138	2.5902	2.58081	3.01418	3.11855	2.95247	2.93754	3.09975	2.7909	2.50624	2.55935	2.54329

## Sheet: Figure.3
Figure.3 Changes of photosynthetic parameters of M.faberi in different periods under drought stress treated
	Date/concentration	CK			LD			MD			SD
Intercellular CO2 concentration	T0	458.496	421.741	404.905	363.521	356.967	323.586	424.419	429.773	412.432	402.814	388.322	309.92
	T7	435.982	416.853	391.791	364.585	364.865	320.195	445.399	432.814	413.041	393.278	370.916	311.932
	T14	448.731	419.583	402.935	365.776	363.244	316.282	430.865	430.628	411.015	409.948	383.287	316.172
	T21	444.972	413.412	380.387	331.18	348.391	360.564	396.436	417.144	377.866	385.03	458.017	282.621
	T28	455.659	416.975	361.831	335.207	346.445	339.491	395.797	416.472	348.942	385.977	455.854	280.328
	T35	466.885	417.322	380.902	336.336	345.983	356.218	403.366	415.693	357.111	388.603	449.078	275.682
	T42	458.534	415.1	348.593	349.715	280.6	228.184	325.894	351.026	312.884	377.793	473.741	287.933
	T49	446.379	415.393	346.295	348.926	286.24	206.064	338.707	358.328	312.613	377.543	467.301	285.346
	T56	450.478	415.19	347.284	337.14	280.015	234.909	345.731	369.423	312.067	370.563	440.666	286.898
	WT7	459.852	414.506	344.064	351.004	362.489	378.628	406.183	347.475	335.279	271.852	283.773	313.784
	WT14	476.981	414.724	362.043	348.91	351.639	389.482	406.424	349.25	335.533	272.275	284.49	311.507
	WT21	446.326	414.842	356.65	349.289	360.031	379.572	405.789	361.252	335.841	272.178	262.387	309.021
Net photosynthetic rate	T0	7.28152	8.02463	7.90995	7.9833	8.62882	8.30606	7.26266	7.90818	7.58542	7.00188	7.6474	7.32464
	T7	9.16284	9.6781	9.44801	9.7295	10.781	9.80526	8.64152	9.49674	8.91913	8.49899	9.22333	8.71116
	T14	7.89271	8.51689	8.20045	7.48825	8.29981	7.89403	6.8899	7.31746	7.10368	8.92188	9.50888	9.06538
	T21	9.37023	10.8164	10.0933	8.63926	8.71408	8.67667	6.83252	6.85082	6.82667	3.99927	4.74739	4.37333
	T28	6.55333	7.23381	6.89357	5.89397	6.92349	6.25873	2.16973	3.53587	2.5528	1.48458	2.18304	1.68381
	T35	9.17339	9.74661	9.46	5.66333	7.03001	6.04667	1.76222	3.2289	2.34556	2.47919	2.50747	2.49333
	T42	7.32705	7.73369	7.54537	4.46931	5.01585	4.74258	2.85844	4.45658	3.50751	0.29638	0.46132	0.37885
	T49	8.29621	9.62839	8.9473	4.37701	4.43407	4.40554	3.60478	4.06052	3.68265	1.12281	1.20281	1.16281
	T56	7.88593	8.38989	7.98791	3.14731	3.45781	3.30256	1.60912	2.27192	1.79052	0.31542	0.4237	0.36956
	WT7	8.23007	8.94461	8.58734	5.25059	5.29009	5.27034	2.37187	4.43233	3.1021	0.59573	0.80785	0.70179
	WT14	8.99811	9.16683	8.93247	5.27198	5.76368	5.51783	3.94071	4.55603	4.24837	2.46558	2.93826	2.55192
	WT21	9.66385	9.91607	9.78996	6.24476	6.30356	6.27416	5.04395	5.15635	5.10015	4.50577	4.57247	4.53912
Transpiration rate	T0	2.64352	2.72463	2.77514	2.68172	2.72172	2.76172	2.7105	2.85052	2.75051	2.57105	2.71107	2.59106
	T7	1.38284	1.4181	1.39717	1.39599	1.39899	1.40199	1.49568	1.525	1.50034	1.35851	1.53945	1.38948
	T14	1.54271	1.61689	1.58493	1.26805	1.32067	1.37329	1.44856	1.69676	1.56266	1.62814	1.6348	1.62714
	T21	1.81245	1.83421	1.82333	1.65056	1.65333	1.6561	0.33753	0.43669	0.37711	0.98384	1.07328	0.99856
	T28	1.31218	1.33022	1.32135	1.37851	1.37944	1.38037	0.43377	0.43901	0.43539	0.17716	0.26822	0.18269
	T35	1.78339	1.99661	1.96332	1.28057	1.39222	1.50387	0.32894	0.5935	0.45122	0.24654	0.33546	0.251
	T42	2.00705	2.27369	2.12252	0.967	1.06698	1.16696	0.61683	0.962	0.77941	0.10243	0.15809	0.10526
	T49	1.29621	1.59839	1.42186	1.11918	1.23525	1.35132	0.81366	0.9242	0.85893	0.16761	0.29511	0.17136
	T56	1.97593	2.18989	2.04412	0.70009	0.74337	0.78665	0.46967	0.62275	0.53621	0.13544	0.2829	0.14917
	WT7	1.92007	2.14461	1.961	2.08925	2.11017	2.13109	1.11915	1.27223	1.18569	0.10739	0.12869	0.10804
	WT14	1.44811	1.48683	1.45838	1.33159	1.40141	1.47123	1.28524	1.60818	1.43671	0.77065	0.78201	0.77033
	WT21	2.23385	2.28607	2.23815	1.92126	2.06076	2.20026	2.64873	2.86347	2.7461	2.93695	2.97289	2.93592
Stomatal conductance	T0	0.09541	0.09923	0.09532	0.09458	0.0984	0.09449	0.0976	0.10142	0.09751	0.09304	0.09888	0.09296
	T7	0.09193	0.09405	0.09199	0.11935	0.12185	0.1193	0.11469	0.11683	0.11466	0.08868	0.09282	0.08865
	T14	0.06655	0.08855	0.06755	0.05851	0.06763	0.05847	0.03037	0.03545	0.03021	0.04606	0.04748	0.04604
	T21	0.0984	0.0986	0.0984	0.02931	0.05105	0.02918	0.0224	0.0226	0.0224	0.01931	0.01942	0.01931
	T28	0.08148	0.1111	0.08229	0.03858	0.03914	0.03856	0.01009	0.01823	0.01006	0.01221	0.02855	0.01218
	T35	0.04163	0.06045	0.04204	0.02598	0.0407	0.02584	0.0074	0.02336	0.00738	0.00668	0.0269	0.00665
	T42	0.071	0.07446	0.07103	0.03448	0.03944	0.03436	0.02655	0.04291	0.02643	0.00427	0.00629	0.00425
	T49	0.09909	0.10891	0.0994	0.040597	0.040603	0.040597	0.02529	0.02819	0.02524	0.00346	0.0074	0.00343
	T56	0.07613	0.08279	0.07626	0.02494	0.02812	0.02493	0.01448	0.0192	0.01434	0.00449	0.00825	0.00446
	WT7	0.08589	0.08879	0.08594	0.074147	0.074153	0.074147	0.06242	0.0664	0.06231	0.0018	0.00298	0.00179
	WT14	0.04454	0.0461	0.04452	0.04782	0.06596	0.04769	0.04614	0.05474	0.04604	0.04944	0.05028	0.04941
	WT21	0.08013	0.10577	0.08095	0.08481	0.09827	0.08464	0.12101	0.12347	0.12091	0.12445	0.12859	0.12435

## Sheet: Figure.4
Figure.4 Effects of different drought stress treatments on relative conductivity and malondialdehyde of M.faberi leaves
	Date/concentration	CK	LD	MD	SD
Relative conductivity	T0	0.728704	0.728704	0.728704	0.728704
	T7	1.00143	0.93585	0.991639	1.00735
	T14	0.956761	0.933004	0.928198	0.912106
	T21	0.940729	0.955934	0.92638	0.971869
	T28	0.849964	0.760518	0.8098	0.941736
	T35	0.841527	0.847624	0.700092	0.86937
	T42	0.695254	0.887946	0.831898	0.866687
	T49	0.794493	0.837036	0.640348	0.654041
	T56	0.540727	0.616845	0.530271	0.865136
	WT7	0.46092	0.425452	0.783702	0.724095
	WT14	0.603208	0.541427	0.571657	0.897796
	WT21	0.610208	0.617183	0.573375	0.656116
Malondialdehyde content	T0	14.706	14.448	10.836	13.33
	T7	30.874	35.604	38.442	40.506
	T14	28.724	27.95	37.324	38.872
	T21	31.906	36.378	34.228	35.69
	T28	20.898	21.156	27.262	21.414
	T35	16.512	17.372	30.53	22.532
	T42	23.392	25.026	24.08	19.522
	T49	18.748	19.608	21.414	19.092
	T56	12.298	23.736	13.416	18.146
	WT7	31.132	31.39	31.734	29.498
	WT14	23.134	19.092	28.638	30.616
	WT21	28.81	18.834	29.068	26.144

## Sheet: Figure.5
Figure. 5 Changes of antioxidant enzymes in leaves of M.faberi under different drought stress treatments
	Date/concentration	CK	LD	MD	SD
Superoxide dismutase	T0	88.7173	85.5	84.5455	96.1063
	T7	97.5155	67.2094	63.9041	58.4209
	T14	101.48	78.2534	82.8083	76.1283
	T21	115.488	94.2296	63.7237	80.9606
	T28	68.7451	55.3081	59.9292	84.9055
	T35	67.4828	71.6261	65.9278	98.1629
	T42	53.2522	96.436	124.757	148.802
	T49	76.2844	148.616	134.908	200.948
	T56	130.953	202.107	205.173	213.677
	WT7	131.541	142.722	125.83	137.43
	WT14	153.495	140.603	118.246	107.858
	WT21	74.7271	72.4503	102.132	100.643
Peroxidase	T0	879.737	855.96	998.62	784.63
	T7	2449	2686.76	6942.79	12102.3
	T14	11412.8	4707.78	7251.88	12292.5
	T21	499.31	3400.06	8726.04	38066.4
	T28	3209.85	9415.56	13814.2	37448.2
	T35	2401.44	19330.4	12340.1	45151.9
	T42	927.29	20519.3	16738.8	22944.5
	T49	15026.9	36093	22968.3	18165.4
	T56	3233.63	37495.8	34167.1	5991.72
	WT7	6871.46	18854.9	9558.22	1307.72
	WT14	11864.6	4684	3186.07	1331.49
	WT21	16025.5	1283.94	3328.73	1688.14
Ascorbate peroxidase	T0	36.3967	37.59	39.38	32.22
	T7	22.6733	91.8867	78.1633	82.9367
	T14	50.7167	95.4667	88.3067	124.107
	T21	133.653	139.023	185.563	139.023
	T28	160.503	162.293	182.58	140.813
	T35	137.83	157.52	159.907	200.48
	T42	76.97	139.023	139.62	178.403
	T49	140.217	154.537	136.637	159.31
	T56	148.57	113.963	115.753	156.327
	WT7	99.0467	89.5	65.6333	174.823
	WT14	122.317	137.233	146.78	133.653
	WT21	177.21	177.807	144.99	139.62

## Sheet: Figure.6
Fig. 6 Effects of different drought stress treatments on osmotic adjustment substances of M.faberi
	Date/concentration	CK	LD	MD	SD
Soluble protein	T0	3.07823	3.07823	3.07823	3.07823
	T7	3.52041	4.41327	4.95748	7.32143
	T14	7.72109	6.35204	6.79422	5.67177
	T21	5.07653	4.31122	5.80782	4.83844
	T28	5.09354	7.17687	5.46769	6.09694
	T35	5.41667	5.84184	6.08844	6.31803
	T42	5.13605	6.59864	5.22109	6.80272
	T49	6.7602	7.10884	9.48129	9.41327
	T56	5.69728	6.92177	5.91837	7.02381
	WT7	6.07993	3.83503	6.78571	7.32143
	WT14	3.61395	4.41327	4.59184	4.2602
	WT21	4.53231	4.64286	5.5017	5.2381
Soluble sugar	T0	48.6947	49.03	48.1581	48.6276
	T7	42.8818	29.2441	37.2702	52.6519
	T14	41.6075	40.0202	36.1077	35.3699
	T21	35.2581	36.5995	31.7033	37.8739
	T28	45.9	57.9952	58.3082	49.0971
	T35	13.2588	13.773	9.34635	16.1429
	T42	7.96022	16.3888	17.7749	13.2365
	T49	9.92763	17.5961	11.9398	26.5389
	T56	12.0739	14.019	14.6673	12.0515
	WT7	18.3339	54.7981	61.7735	70.7163
	WT14	21.4862	29.7806	39.7072	48.404
	WT21	44.1115	26.047	28.9758	46.0565
Proline	T0	4.73085	5.70785	3.89694	4.58777
	T7	0.834028	0.820614	2.29394	2.99819
	T14	2.37666	1.44885	1.00618	1.31023
	T21	5.0908	5.65196	6.21312	5.62066
	T28	4.23006	4.64366	3.80975	2.86404
	T35	2.54657	2.90205	6.11475	4.16969
	T42	4.58106	2.91994	4.5833	3.75609
	T49	0.878742	0.377946	3.51687	10.4788
	T56	1.65453	2.55105	7.96815	12.8576
	WT7	0.804964	1.27893	7.94355	10.8321
	WT14	0.988292	0.912278	0.733422	2.56893
	WT21	0.666351	1.85798	0.804964	0.887685

## Sheet: Figure.8
Fig. 8 Correlation analysis of M.faberi under drought stress
Treat	Plant height	The number of shoots	Shoot length	MDA	EC	Chlorophyll a	Chlorophyll b	Chlorophyll a＋b	Chlorophyll a/b	Pn	Gs	Ci	SOD	POD	APX	SP	SS	Pro
CK-1	60.36	7	25.36	13.416	0.55701	0.141427	0.005319	0.146746	26.589	8.02445	0.0756928	411.493	159.6	3067.19	148.57	5.9949	16.2994	1.23422
CK-2	37.89	4	27.89	13.416	0.56621	0.1422	0.005073	0.147273	28.0307	8.20555	0.0820183	413.895	123.913	3566.5	144.99	5.84184	10.5313	1.82444
CK-3	36.08	5	46.08	10.062	0.49896	0.14215	0.005703	0.147853	24.9255	8.03374	0.0806586	415.313	109.347	3067.19	152.15	5.2551	9.39106	1.90493
LD-1	38.88	7	30.88	23.478	0.563182	0.10829	0.0086955	0.116986	12.4536	3.16166	0.0270247	375.105	190	37733.6	110.98	7.16837	19.5188	2.16651
LD-2	40.08	11	26.08	24.768	0.634037	0.108173	0.008994	0.117167	12.0272	3.20409	0.0247499	368.171	198.686	37804.9	107.4	6.65816	12.5434	2.70307
LD-3	39.54	11	21.54	22.962	0.653317	0.108574	0.008682	0.117256	12.5057	3.54194	0.0278051	343.988	217.636	36948.9	123.51	6.93878	9.9947	2.78356
MD-1	42	9	33.98	12.9	0.523597	0.148194	0.005499	0.153693	26.9493	2.2446	0.019091	321.173	190	34523.7	118.14	5.2551	21.1956	6.61331
MD-2	39.78	14	21.78	13.416	0.566413	0.147715	0.0056055	0.15332	26.3518	1.46765	0.0143881	310.627	207.882	34951.7	116.35	5.66327	12.5434	9.96016
MD-3	53.3	11	20.45	13.932	0.500803	0.147206	0.00609	0.153296	24.1717	1.95932	0.0170529	308.829	217.636	33025.8	112.77	6.83673	10.263	7.33097
SD-1	35.4	9	20.1	18.576	0.866071	0.103421	0.0083415	0.111762	12.3983	0.328846	0.00581425	335.156	228	6205.71	152.15	6.17347	14.2202	12.1601
SD-2	36	8	19.03	17.802	0.874272	0.106061	0.0082995	0.114361	12.7792	0.439128	0.00483486	336.391	174	5849.06	152.15	6.81122	10.0618	12.7704
SD-3	49.7	8	22.51	18.06	0.855066	0.105132	0.0081345	0.113267	12.9242	0.340717	0.00847347	336.027	239.032	5920.39	164.68	8.08673	11.8727	13.6424

## Sheet: Figure.7
Fig. 7 The changes of anatomical structure of M.faberi under different salt stress conditions
	Date/concentration	CK	LD	MD	SD
Epicuticle	T0	0.01467	0.016	0.013	0.014
	T7	0.01533	0.01633	0.01567	0.01467
	T14	0.018	0.01667	0.01667	0.017
	T21	0.02	0.01767	0.01733	0.01787
	T28	0.019	0.01833	0.019	0.018
	T35	0.01817	0.01633	0.018	0.01633
	T42	0.01933	0.01733	0.01833	0.017
	T49	0.01933	0.017	0.01833	0.01933
	T56	0.01667	0.01567	0.01667	0.01967
	WT7	0.01767	0.01667	0.017	0.022
	WT14	0.018	0.015	0.01333	0.01867
	WT21	0.01767	0.01633	0.01433	0.01367
Palisade tissue	T0	0.06667	0.054	0.065	0.067
	T7	0.072	0.068	0.076	0.07333
	T14	0.07267	0.08	0.078	0.08033
	T21	0.08	0.08733	0.07767	0.08133
	T28	0.08333	0.093	0.08367	0.07
	T35	0.07067	0.07833	0.08667	0.05033
	T42	0.07633	0.07633	0.08067	0.066
	T49	0.08	0.063	0.076	0.08
	T56	0.08433	0.068	0.07067	0.08433
	WT7	0.081	0.08267	0.07767	0.085
	WT14	0.07667	0.085	0.07833	0.07433
	WT21	0.067	0.08167	0.07567	0.07033
Spongy tissue	T0	0.07867	0.078	0.073	0.076
	T7	0.07167	0.07033	0.068	0.07
	T14	0.071	0.06933	0.073	0.063
	T21	0.07833	0.07133	0.06333	0.06133
	T28	0.07133	0.08867	0.07433	0.07333
	T35	0.07467	0.078	0.09867	0.07267
	T42	0.07033	0.077	0.06333	0.071
	T49	0.07733	0.053	0.067	0.06
	T56	0.06733	0.05633	0.066	0.057
	WT7	0.071	0.08033	0.074	0.07167
	WT14	0.06333	0.07467	0.05467	0.06767
	WT21	0.067	0.06633	0.06367	0.06833
Hypodermis	T0	0.01723	0.016	0.017	0.017
	T7	0.01633	0.01733	0.017	0.01613
	T14	0.01867	0.022	0.023	0.01567
	T21	0.02067	0.02033	0.02167	0.01633
	T28	0.01933	0.02067	0.021	0.018
	T35	0.02067	0.02167	0.01867	0.01567
	T42	0.01933	0.019	0.01367	0.017
	T49	0.01967	0.018	0.01667	0.01633
	T56	0.01967	0.01567	0.017	0.01733
	WT7	0.02033	0.01833	0.02133	0.022
	WT14	0.01967	0.019	0.019	0.02067
	WT21	0.02	0.017	0.019	0.02067

## Sheet: Supplementaray Figure.3
Supplementaray Figure.3： Principal component analysis of M.faberi under drought stress.
SampleID	GroupID	Plant height（cm)	the number of shoots	Shoot length(mm)	MDA	EC	chlorophyll_a	chlorophyll_b	chlorophyll_a/b	chlorophyll_a+b	Pn	Gs	Ci	Tr	SOD	POD	APX	SP	SS	pro
CK-1-0d	A	32.6167	6	3.31	13.33	0.728704	0.0808211	0.00388	22.1804	0.0847011	7.7387	0.097319	450.151	2.71443	88.7173	879.737	36.3967	3.07823	48.6276	4.73085
CK-1-7d	A	33.93	5	4.83	30.874	1.00143	0.16123	0.009007	18.035	0.170237	9.42965	0.132987	419.231	1.39937	97.5155	2449	22.6733	3.52041	42.8818	0.834028
CK-1-14d	A	36.7667	3	8.25	28.724	0.956761	0.211845	0.016933	12.7841	0.228778	8.20335	0.0775538	399.986	1.58151	101.48	11412.8	50.7167	7.72109	41.6075	2.37666
CK-1-21d	A	38.7	4	15.7133	31.906	0.940729	0.206158	0.0153905	13.7581	0.221548	10.0933	0.0985	365.111	1.82333	115.488	499.31	133.653	5.07653	35.2581	5.0908
CK-1-28d	A	40.2167	5	16.8233	20.898	0.849964	0.149788	0.0055905	27.8339	0.155379	6.89357	0.0962908	364.238	1.32125	68.7451	3209.85	160.503	5.09354	45.9	4.23006
CK-1-35d	A	40.9	5.33333	19.21	16.512	0.841527	0.129646	0.008209	15.734	0.137855	9.46	0.0510444	327.889	1.91444	67.4828	2401.44	137.83	5.41667	13.2588	2.54657
CK-1-42d	A	43	5.33333	27.8667	23.392	0.695254	0.124474	0.003713	38.2027	0.128187	7.53537	0.0727251	433.34	2.13442	53.2522	927.29	76.97	5.13605	7.96022	4.58106
CK-1-49d	A	44	5.33333	29.3667	18.748	0.794493	0.11533	0.0102015	11.3301	0.125532	8.9573	0.103998	432.32	1.43882	76.2844	15026.9	140.217	6.7602	9.92763	0.878742
CK-1-56d	A	44.7767	5.33333	33.11	12.298	0.540727	0.141926	0.005365	26.5151	0.147291	8.08791	0.0794566	413.567	2.06998	130.953	3233.63	148.57	5.69728	12.0739	1.65453
LD-1-0d	B	29.3833	14.3333	4.34333	13.33	0.728704	0.0808211	0.00388	22.1804	0.0847011	7.7387	0.097319	450.151	2.71443	84.5455	879.737	36.3967	3.07823	48.6276	4.73085
LD-1-7d	B	31.1867	13.6667	8.21667	35.604	0.93585	0.179117	0.012312	14.9325	0.191429	10.1053	0.120603	415.466	1.39899	67.2094	2686.76	91.8867	4.41327	29.2441	0.820614
LD-1-14d	B	34.5	8.33333	9.65333	27.95	0.933004	0.205433	0.01622	13.0453	0.221653	7.89403	0.063065	377.575	1.25516	78.2534	4707.78	95.4667	6.35204	40.0202	1.44885
LD-1-21d	B	34.6	8.33333	11.76	36.378	0.955934	0.211079	0.0166905	12.728	0.227769	8.67667	0.0401778	329.667	1.65333	94.2296	3400.06	139.023	4.31122	36.5995	5.65196
LD-1-28d	B	35.8	7.33333	14.9	21.156	0.760518	0.153434	0.013925	11.4345	0.167359	6.35873	0.0388622	347.851	1.37944	55.3081	9415.56	162.293	7.17687	57.9952	4.64366
LD-1-35d	B	36.4333	8.66667	16.36	17.372	0.847624	0.139882	0.00856	16.3414	0.178442	6.24667	0.0333444	349.667	1.39222	71.6261	19330.4	157.52	5.84184	13.773	2.90205
LD-1-42d	B	36.6667	8.33333	21.4867	25.026	0.887946	0.120144	0.00848	14.5274	0.128624	4.74258	0.0369626	403.25	1.06698	96.436	20519.3	139.023	6.59864	16.3888	2.91994
LD-1-49d	B	38.2333	9.33333	23.8333	19.608	0.837036	0.123239	0.006645	18.6355	0.129884	4.40554	0.0405989	414.848	1.23525	148.616	36093	154.537	7.10884	17.5961	0.377946
LD-1-56d	B	39.5	9.66667	26.1667	23.736	0.616845	0.108346	0.0087905	12.3288	0.117136	3.30256	0.0265266	362.421	0.74337	202.107	37495.8	113.963	6.92177	14.019	2.55105
MD-1-0d	C	33.3667	15.33	3.92333	13.33	0.728704	0.0808211	0.00388	22.1804	0.0847011	7.7387	0.097319	450.151	2.71443	85.5	879.737	36.3967	3.07823	48.6276	4.73085
MD-1-7d	C	37.9433	15.6667	6.45667	38.442	0.991639	0.166496	0.00723	23.0285	0.167219	9.01913	0.115758	415.423	1.51034	63.9041	6942.79	78.1633	4.95748	37.2702	2.29394
MD-1-14d	C	38.8667	9	6.55667	37.324	0.928198	0.196531	0.01285	15.365	0.209381	7.10368	0.0329136	347.023	1.57266	82.8083	7251.88	88.3067	6.79422	36.1077	1.00618
MD-1-21d	C	41.8667	11.3333	11.9833	34.228	0.92638	0.19523	0.012619	15.5852	0.207849	6.83667	0.0225	347.444	0.387111	63.7237	8726.04	185.563	5.80782	31.7033	6.21312
MD-1-28d	C	42	10.3333	14.03	27.262	0.8098	0.19085	0.0080295	24.742	0.19888	2.7528	0.0141576	276.534	0.436395	59.9292	13814.2	182.58	5.46769	58.3082	3.80975
MD-1-35d	C	42.1333	12.6667	15.2233	30.53	0.700092	0.117919	0.0100225	13.611	0.127941	2.44556	0.0153833	249.333	0.461222	65.9278	12340.1	159.907	6.08844	9.34635	6.11475
MD-1-42d	C	42.4	10.6667	23.16	24.08	0.831898	0.124534	0.0057465	21.9429	0.13028	3.60751	0.0347315	349.802	0.789412	124.757	16738.8	139.62	5.22109	17.7749	4.5833
MD-1-49d	C	43.6667	11	24.5333	21.414	0.640348	0.103829	0.004347	23.909	0.108176	3.78265	0.0267442	358.546	0.86893	134.908	22968.3	136.637	9.48129	11.9398	3.51687
MD-1-56d	C	45.0267	11.3333	25.4033	13.416	0.530271	0.147705	0.0057315	25.8243	0.153436	1.89052	0.016844	313.543	0.546207	205.173	34167.1	115.753	5.91837	14.019	7.96815
SD-1-0d	D	32.9767	12.33	4.39	13.33	0.728704	0.0808211	0.00388	22.1804	0.0847011	7.7387	0.097319	450.151	2.71443	88.7173	879.737	36.3967	3.07823	48.6276	4.73085
SD-1-7d	D	35.58	9.33333	6.30333	40.506	1.00735	0.142633	0.00515	28.3085	0.147783	8.81116	0.0907496	414.332	1.44948	58.4209	12102.3	82.9367	7.32143	52.6519	2.99819
SD-1-14d	D	36.6667	6.33333	8.98333	38.872	0.912106	0.165142	0.0091695	18.5376	0.174311	9.16538	0.0467667	354.233	1.63147	76.1283	12292.5	124.107	5.67177	35.3699	1.31023
SD-1-21d	D	37.0667	7.33333	12.4633	35.69	0.971869	0.210177	0.0153805	13.8812	0.225558	4.37333	0.0193667	349.333	1.02856	80.9606	38066.4	139.023	4.83844	37.8739	5.62066
SD-1-28d	D	38.0333	7.66667	17.6133	21.414	0.941736	0.173921	0.0189055	9.94307	0.192827	1.78381	0.0203791	353.779	0.222691	84.9055	37448.2	140.813	6.09694	49.0971	2.86404
SD-1-35d	D	38.5	8.33333	17.3433	22.532	0.86937	0.177589	0.010976	16.3743	0.188565	2.49333	0.01679	377.889	0.291	98.1629	45151.9	200.48	6.31803	16.1429	4.16969
SD-1-42d	D	39.2	8	18.4967	19.522	0.866687	0.175904	0.007653	23.7524	0.183557	0.378853	0.00527537	406.51	0.13026	148.802	22944.5	178.403	6.80272	13.2365	3.75609
SD-1-49d	D	39.9333	8.33333	20.5467	19.092	0.654041	0.177211	0.006596	25.8665	0.217211	1.16281	0.00542621	352.926	0.231357	200.948	18165.4	159.31	9.41327	26.5389	10.4788
SD-1-56d	D	40.3667	8.33333	20.5467	18.146	0.865136	0.104871	0.0082585	12.7006	0.11313	0.369563	0.00637419	335.858	0.20917	213.677	5991.72	156.327	7.02381	12.0515	12.8576

## Sheet: Supplementaray date
Multiple comparisons of data in this study
	Test details	Mean 1	Mean 2	Mean Diff.	q	Adjusted P Value
The number of new shoots	CK vs. LD	5.361	9.944	-4.583	9.463	<0.001
	CK vs. MD	5.361	12.58	-7.222	14.91	<0.001
	CK vs. SD	5.361	9	-3.639	7.513	<0.001
	LD vs. MD	9.944	12.58	-2.639	5.448	0.002
	LD vs. SD	9.944	9	0.9444	1.95	0.52
	MD vs. SD	12.58	9	3.583	7.398	<0.001
New shoot length	CK vs. LD	19.32	19.13	0.1822	0.06663	>0.99
	CK vs. MD	19.32	18.42	0.8986	0.3286	>0.99
	CK vs. SD	19.32	16.89	2.427	0.8874	0.92
	LD vs. MD	19.13	18.42	0.7164	0.2619	>0.99
	LD vs. SD	19.13	16.89	2.245	0.8208	0.94
	MD vs. SD	18.42	16.89	1.528	0.5588	0.98
Plant heigth	CK vs. LD	33.21	37.51	-4.303	2.986	0.17
	CK vs. MD	33.21	38.38	-5.172	3.59	0.07
	CK vs. SD	33.21	34.16	-0.9493	0.6589	0.97
	LD vs. MD	37.51	38.38	-0.8692	0.6033	0.97
	LD vs. SD	37.51	34.16	3.353	2.327	0.36
	MD vs. SD	38.38	34.16	4.223	2.931	0.18
Chlorophyll a	CK vs. LD	1.804	1.724	0.08036	0.5608	0.98
	CK vs. MD	1.804	1.807	-0.003056	0.02133	>0.99
	CK vs. SD	1.804	1.744	0.05962	0.416	>0.99
	LD vs. MD	1.724	1.807	-0.08342	0.5822	0.98
	LD vs. SD	1.724	1.744	-0.02075	0.1448	>0.99
	MD vs. SD	1.807	1.744	0.06267	0.4374	0.99
Chlorophyll b	CK vs. LD	0.7689	0.7788	-0.009812	0.1448	>0.99
	CK vs. MD	0.7689	0.7363	0.03268	0.4824	0.99
	CK vs. SD	0.7689	0.7283	0.04066	0.6	0.97
	LD vs. MD	0.7788	0.7363	0.0425	0.6272	0.97
	LD vs. SD	0.7788	0.7283	0.05047	0.7448	0.95
	MD vs. SD	0.7363	0.7283	0.007971	0.1176	>0.99
Chlorophyll a/b	CK vs. LD	2.38	2.257	0.1227	1.955	0.52
	CK vs. MD	2.38	2.452	-0.07261	1.157	0.85
	CK vs. SD	2.38	2.336	0.04317	0.6881	0.96
	LD vs. MD	2.257	2.452	-0.1953	3.113	0.14
	LD vs. SD	2.257	2.336	-0.07949	1.267	0.81
	MD vs. SD	2.452	2.336	0.1158	1.846	0.56
Chlorophyll a+b	CK vs. LD	2.573	2.607	-0.03392	0.1689	>0.99
	CK vs. MD	2.573	2.606	-0.03326	0.1656	>0.99
	CK vs. SD	2.573	2.583	-0.009966	0.04962	>0.99
	LD vs. MD	2.607	2.606	0.0006614	0.003293	>0.99
	LD vs. SD	2.607	2.583	0.02395	0.1193	>0.99
	MD vs. SD	2.606	2.583	0.02329	0.116	>0.99
Upper epidermis	CK vs. LD	0.01782	0.01661	0.001209	2.286	0.38
	CK vs. MD	0.01782	0.01647	0.001348	2.549	0.29
	CK vs. SD	0.01782	0.01735	0.0004692	0.8871	0.92
	LD vs. MD	0.01661	0.01647	0.0001392	0.2631	>0.99
	LD vs. SD	0.01661	0.01735	-0.00074	1.399	0.76
	MD vs. SD	0.01647	0.01735	-0.0008792	1.662	0.65
Palisade tissue	CK vs. LD	0.07589	0.07644	-0.000555	0.2262	>0.99
	CK vs. MD	0.07589	0.07717	-0.001279	0.5212	0.98
	CK vs. SD	0.07589	0.07353	0.002363	0.963	0.9
	LD vs. MD	0.07644	0.07717	-0.0007242	0.2951	>0.99
	LD vs. SD	0.07644	0.07353	0.002918	1.189	0.83
	MD vs. SD	0.07717	0.07353	0.003642	1.484	0.72
Spongy tissue	CK vs. LD	0.07183	0.07194	-0.00011	0.04608	>0.99
	CK vs. MD	0.07183	0.06992	0.001916	0.8025	0.94
	CK vs. SD	0.07183	0.06767	0.004166	1.745	0.61
	LD vs. MD	0.07194	0.06992	0.002026	0.8486	0.93
	LD vs. SD	0.07194	0.06767	0.004276	1.791	0.59
	MD vs. SD	0.06992	0.06767	0.00225	0.9425	0.91
Lower epidermis	CK vs. LD	5.167	9.944	-4.778	9.155	<0.001
	CK vs. MD	5.167	12.44	-7.278	13.95	<0.001
	CK vs. SD	5.167	8.861	-3.694	7.079	<0.001
	LD vs. MD	9.944	12.44	-2.5	4.79	0.008
	LD vs. SD	9.944	8.861	1.083	2.076	0.47
	MD vs. SD	12.44	8.861	3.584	6.866	<0.001
